# Supplementary material
Source: PubMed Central journal article supplement (PMC6303266)

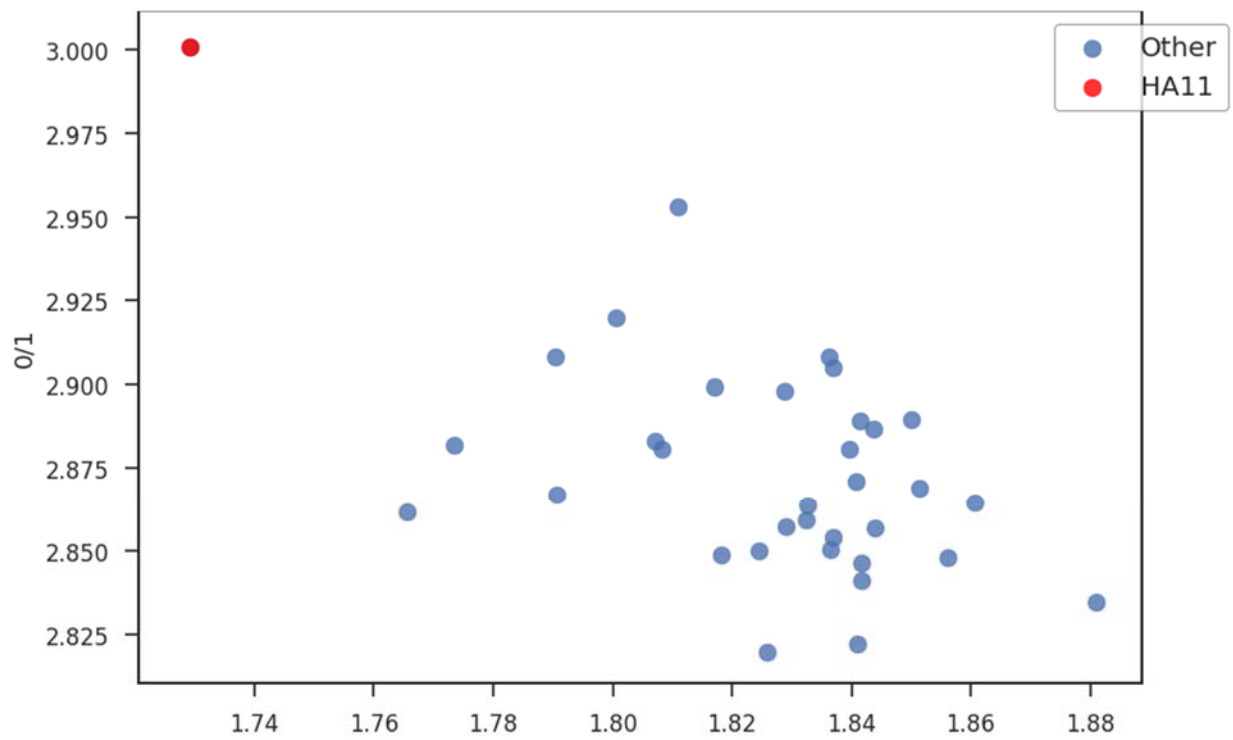

Supplement: 41431_2018_270_MOESM10_ESM.pdf [file 41431_2018_270_MOESM10_ESM.pdf]

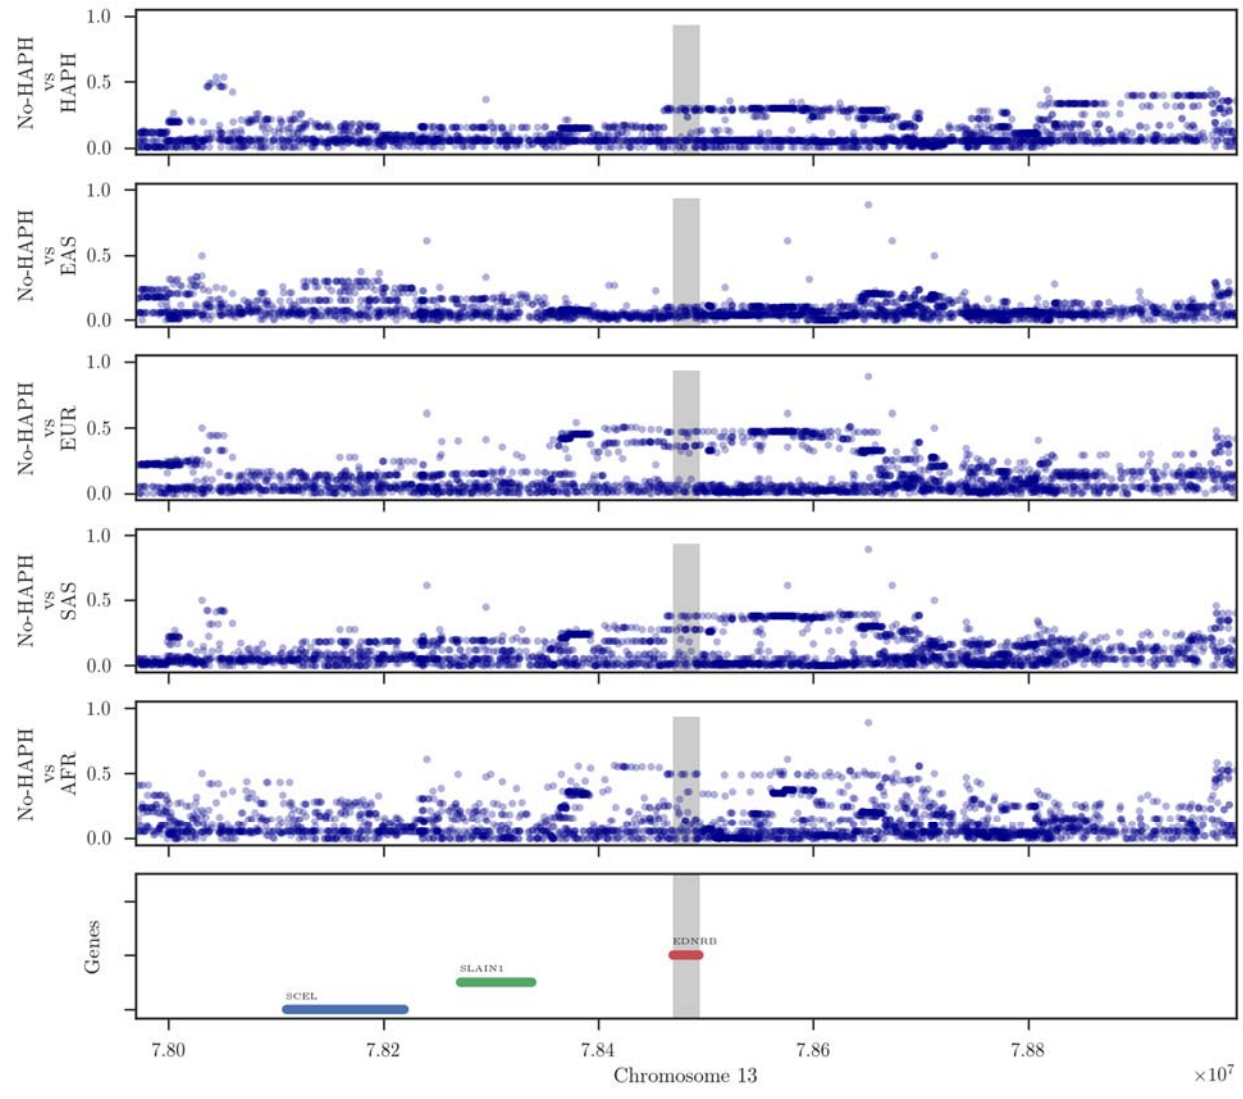

Supplement: 41431_2018_270_MOESM5_ESM.pdf [file 41431_2018_270_MOESM5_ESM.pdf]

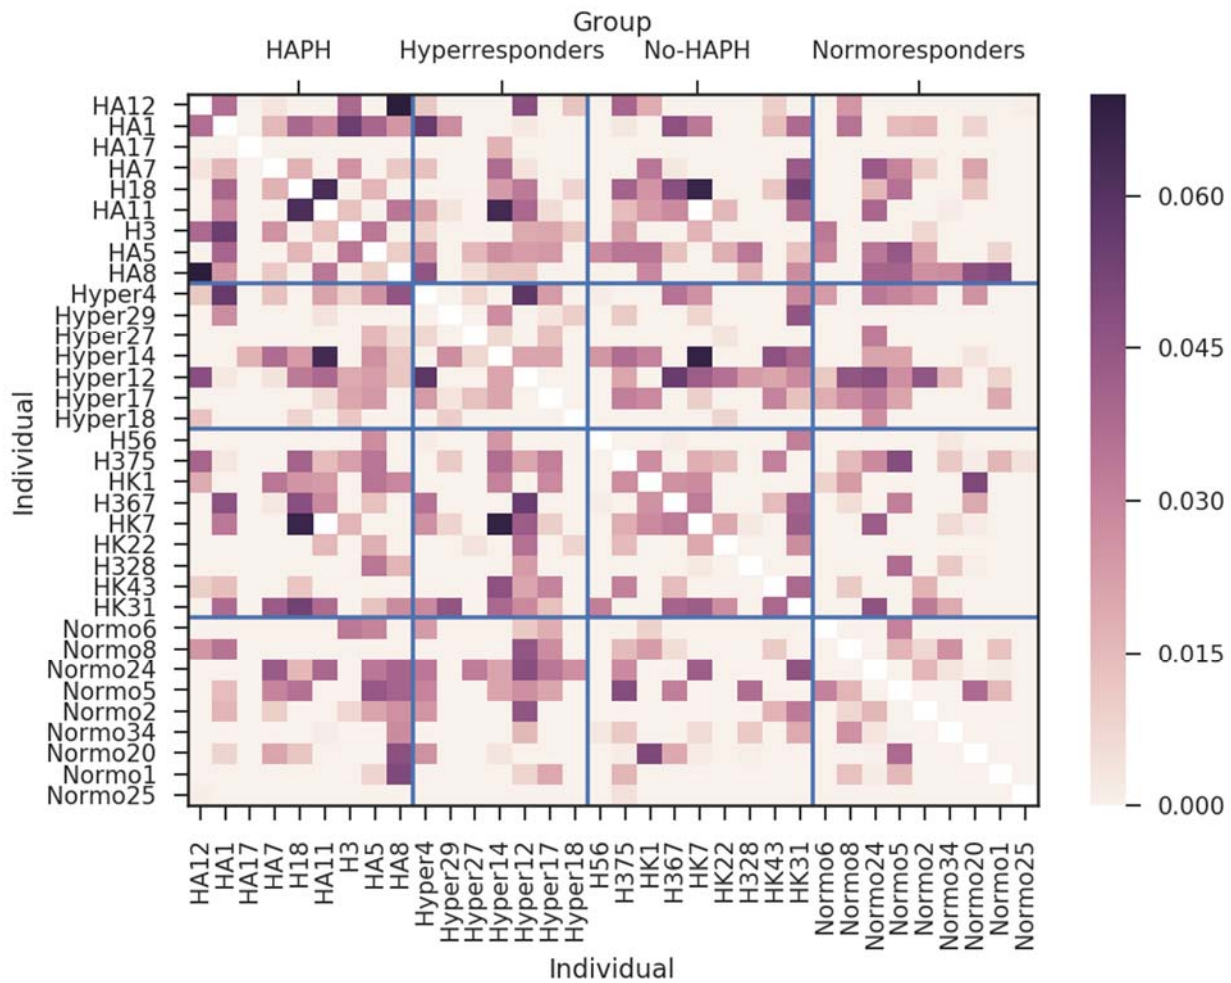

Supplement: 41431_2018_270_MOESM9_ESM.pdf [file 41431_2018_270_MOESM9_ESM.pdf]
